# Supplementary material
Source: PubMed Central journal article supplement (PMC2658099)

## SUPPLEMENTARY FIGURE LEGENDS

Supplemental Figure 1. PDGF-BB inhibits NMDA-evoked currents in an NR2B-dependent fashion. A) Vehicle (0.0002% BSA, 8  $\mu$ M HCl) or 10 ng/mL PDGF-BB was applied to isolated CA1 hippocampal neurons. Kainate-evoked currents were recorded every 60 seconds by application of 40  $\mu$ M kainate for 3 seconds. The black bar indicates vehicle or PDGF-BB application. Data are representative of 6 experiments.

Supplemental Figure 2. Inhibition of the neuronal internalization machinery does not attenuated PDGF-BB inhibition of NMDA currents. 10 ng/mL PDGF-BB was applied to isolated CA1 hippocampal neurons in the absence (control) or the presence of peptide inhibitors of dynamin (Panel A, amphiphysin-3H3, panel B dynamin inhibitor peptide) in the ICF. NMDA-evoked currents were recorded every 60 seconds by application of 1  $\mu$ M NMDA/0.5  $\mu$ M glycine for 2 seconds. The black bar indicates PDGF-BB application. Data are representative of 5 or 6 experiments. C, The amphiphysin-SH3 peptide did attenuate the SKF 38393-induced increase in NMDA-evoked current,  $n = 5-7$ , indicating that the amphiphysin-SH3 is active when applied intracellularly to isolated CA1 neurons.

Supplemental Figure 3. PDGF $\beta$ R and NR2B do not physically interact in hippocampal tissue. CA1 hippocampal slices were treated with vehicle or 10  $\mu$ g/mL PDGF-BB for 10 minutes. Lysates were incubated with anti-PDGF $\beta$ R antibodies conjugated to agarose beads and blotted using anti-PDGF $\beta$ R or NR2B. Blots are representative of 4 experiments.

# Supplementary Figure 1

## Kainate

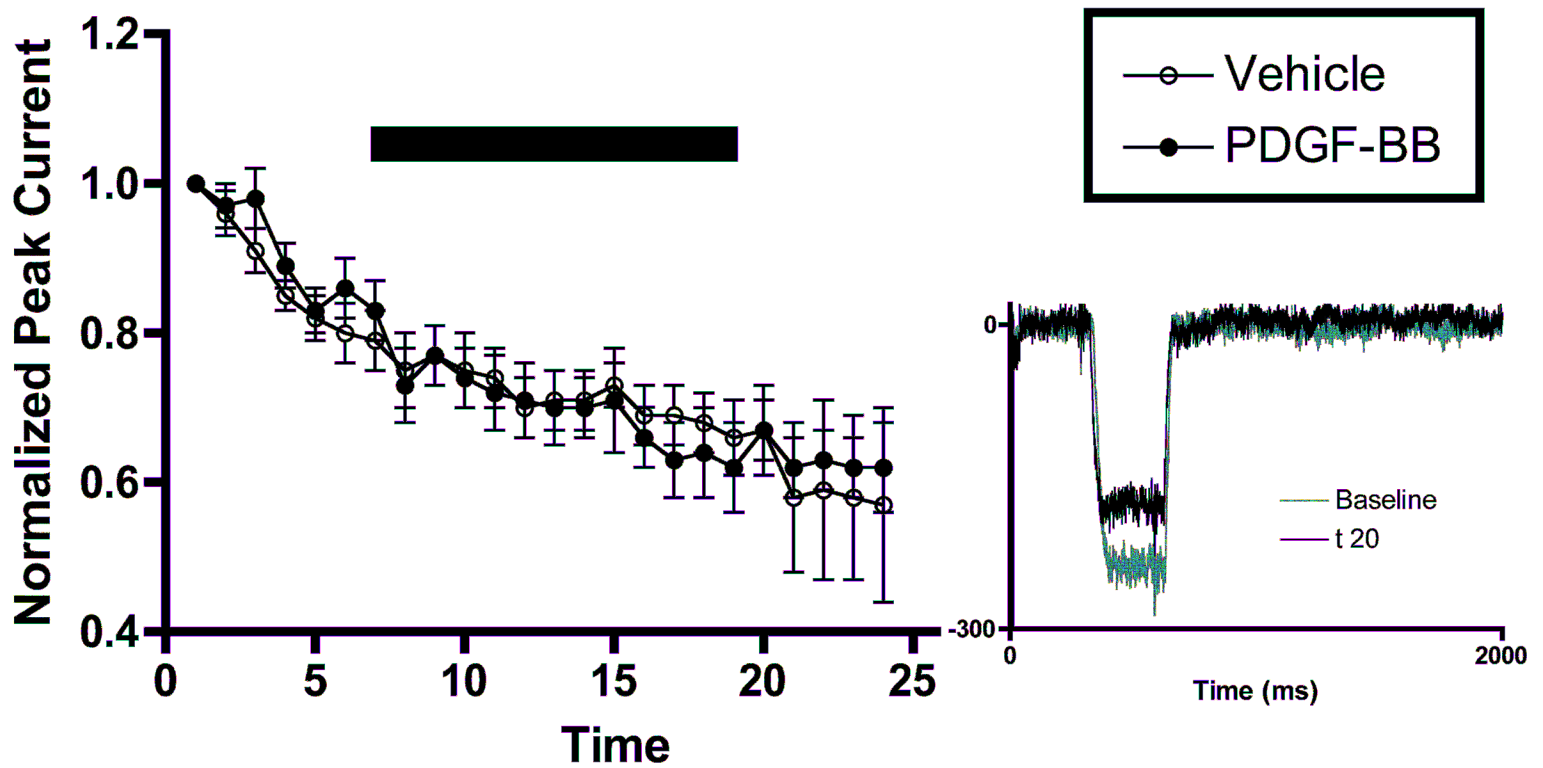

# Supplementary Figure 2

## A

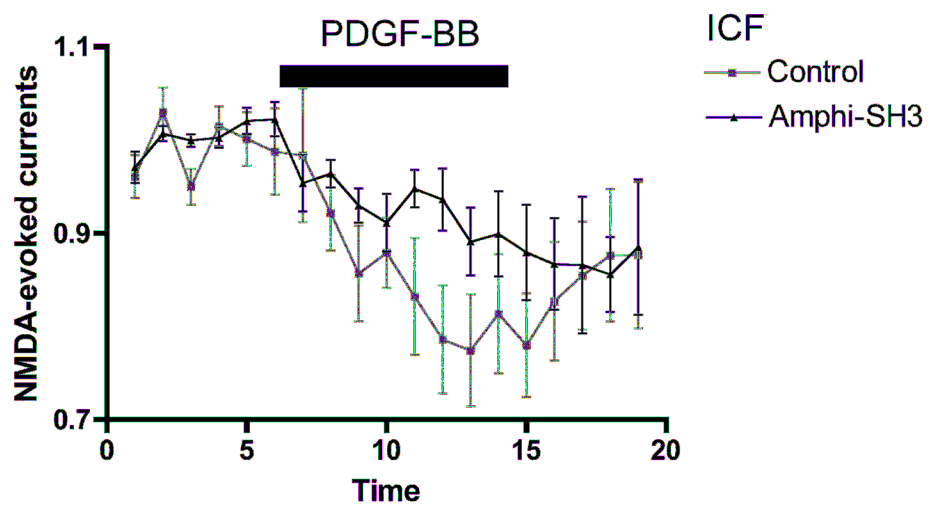

## B

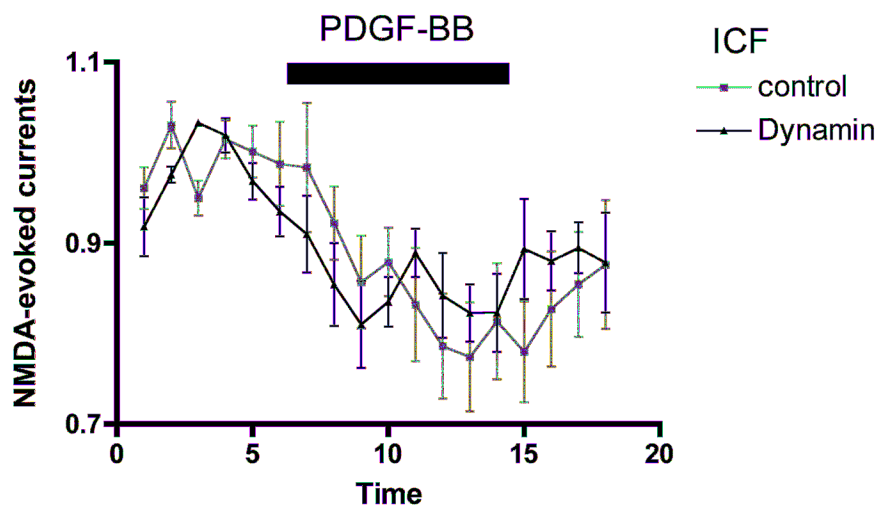

## C

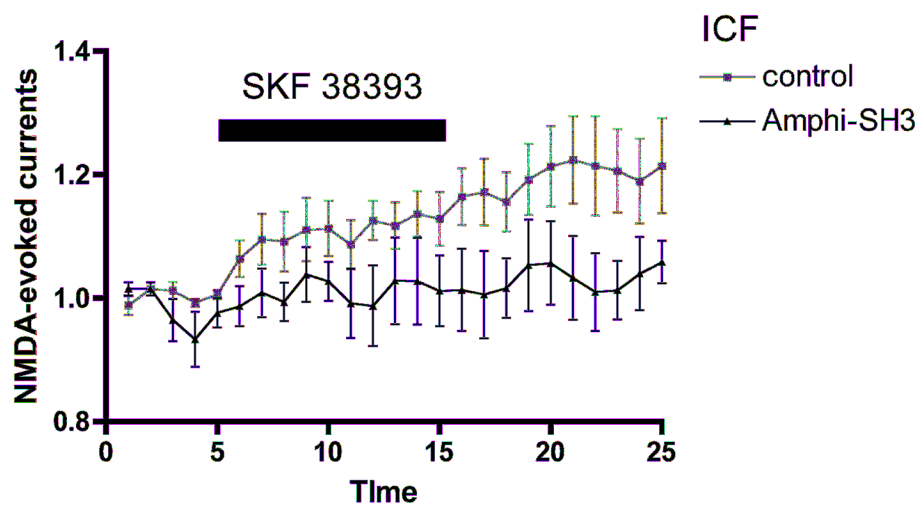

# Supplementary Figure 3

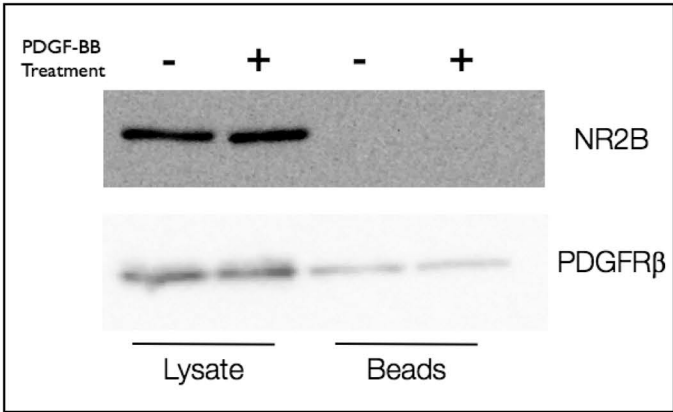

Supplement: M805384200_1.pdf [file M805384200_1.pdf]
